# Supplementary material for: Genetic and functional evidence for a locus controlling otitis media at chromosome 10q26.3
Source: PubMed Central journal article supplement (PMC3926687; doi:10.1186/1471-2350-15-18), 2014-02-06

**Figure S1** : LocusZoom plot of association (Figure 1) focused on the *TCERG1L/PPP2R2D* intergenic region. Pairwise values of LD with the top SNP (rs7922424; in purple) were calculated using the HapMap CEU population.

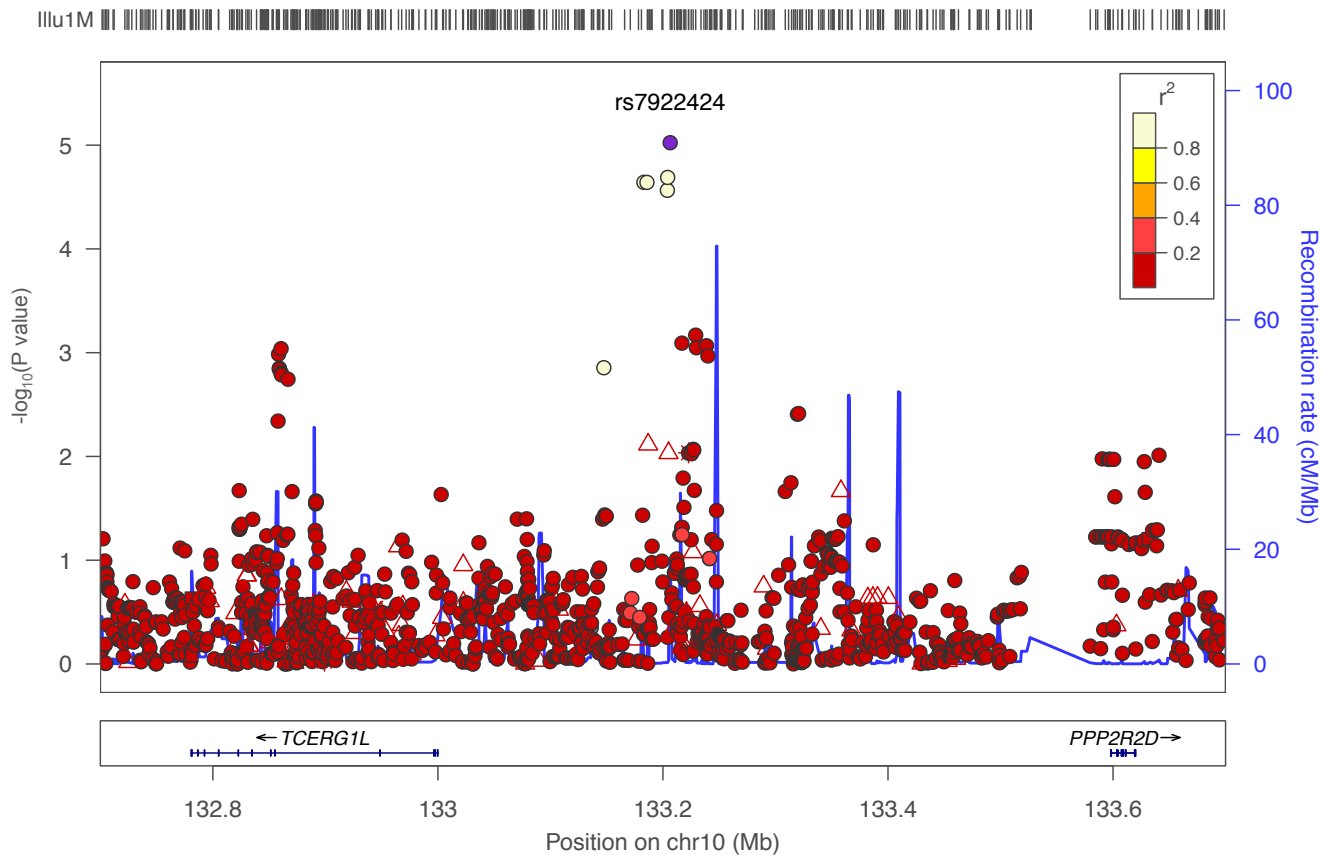

**Figure S2.** Conserved non-coding sequence plot of the intergenic region containing the 9 top intergenic SNPs between *TCERG1L* and *PPP2R2D*. The top SNP (rs7922424) is annotated in orange, with SNPs  $P < 0.0001$  in green and additional SNPs ( $P < 0.001$ ) annotated in purple. Colours indicate the following regions; repeats (blue), genes (brown) and coding sequence (red). The three SNPs of interest are highlighted by bold text. Species are human (H), mouse (M), and rat (R).

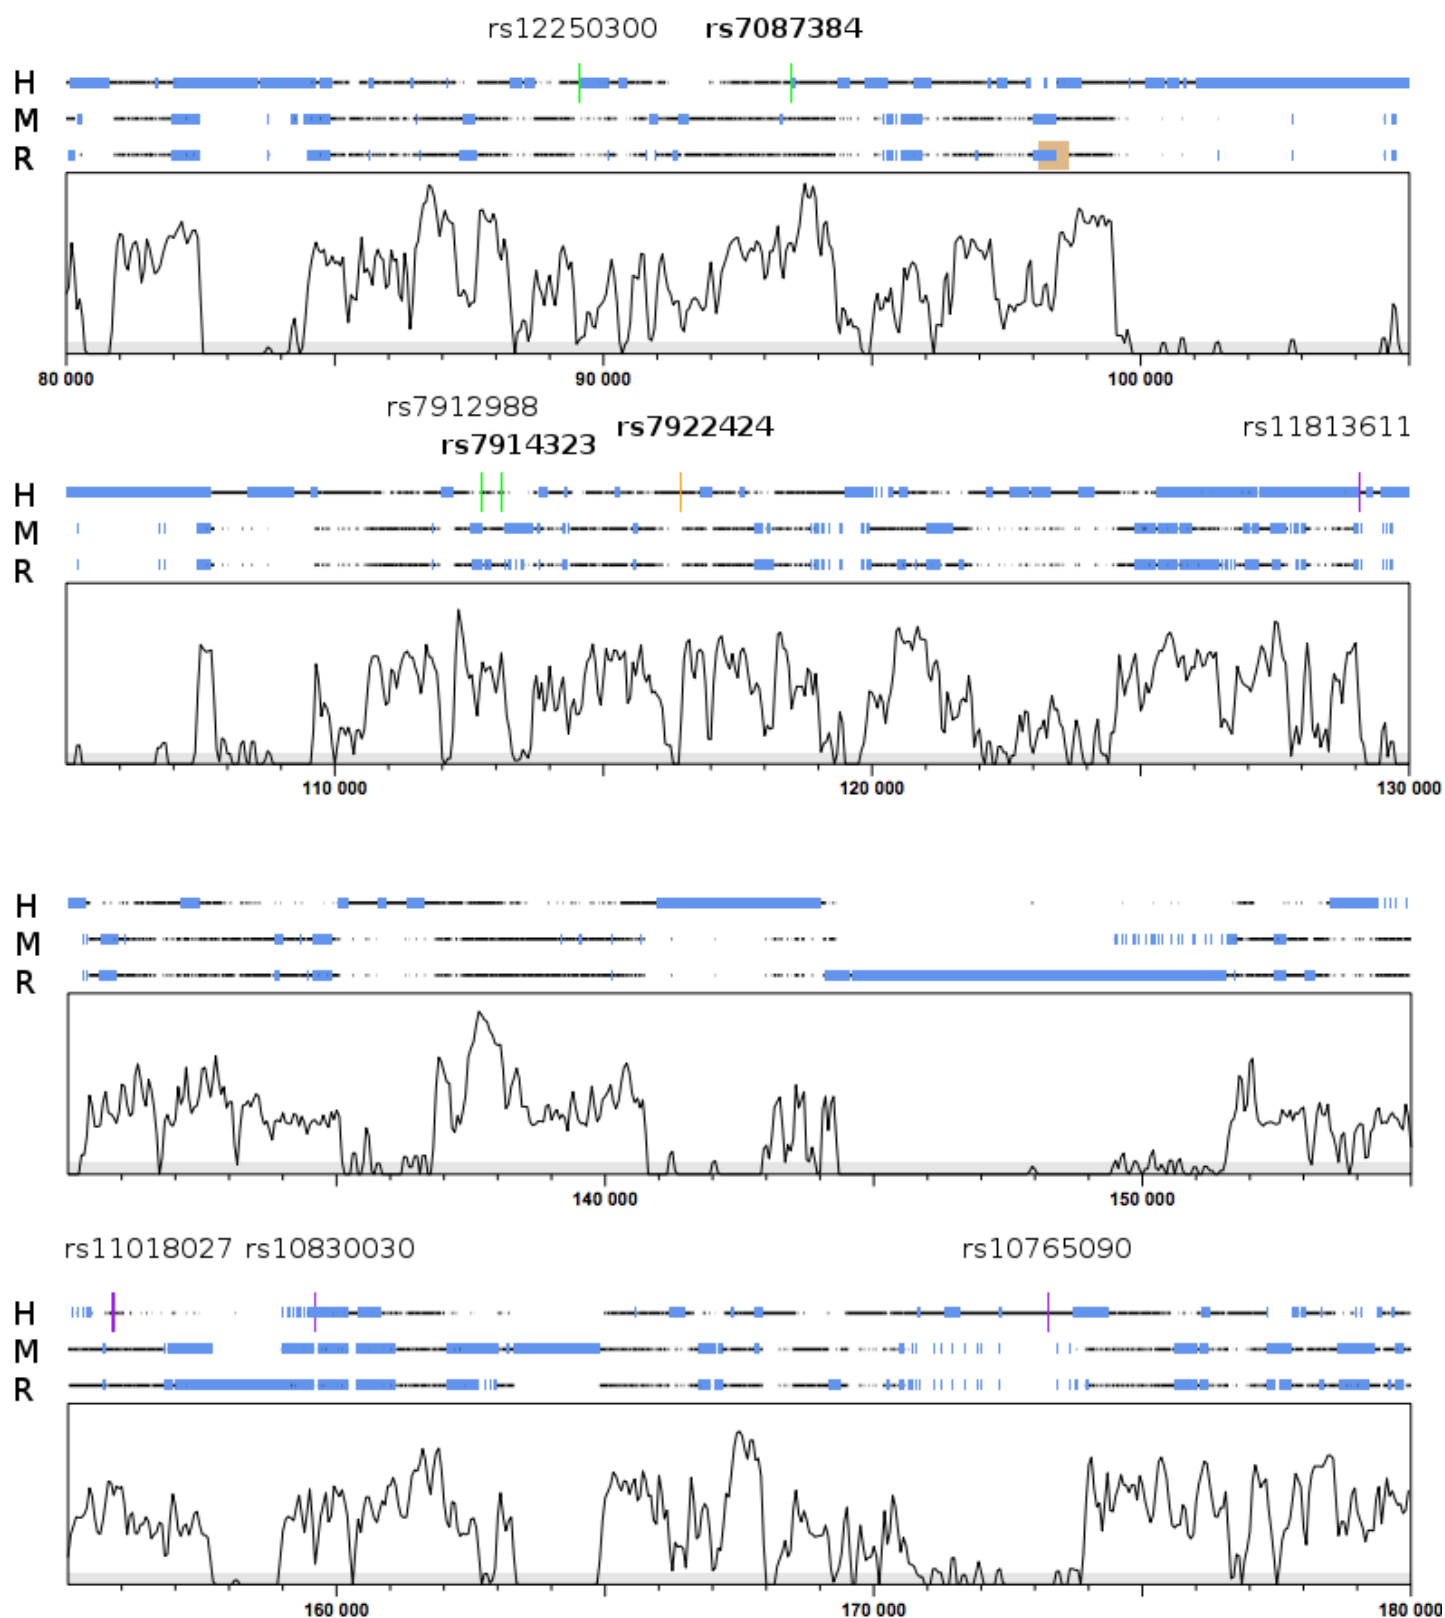

**Figure S3.** Pairwise LD between the 9 associated SNPs ( $P < 0.0001$ ) in the Raine Study cohort, where (A) is the  $D'$  value and (B) is the  $r^2$  value. For both  $D'$  and  $r^2$ , LD measures are indicated at the matrix intercept between two markers and are indicative of a decimal value. A square with no value indicated at the intercept equates to a value of 1.00 (or complete LD). For  $D'$  measures, red and shades of red indicate a higher degree of confidence (i.e.  $\text{LOD} \geq 2.0$ ).

(A)

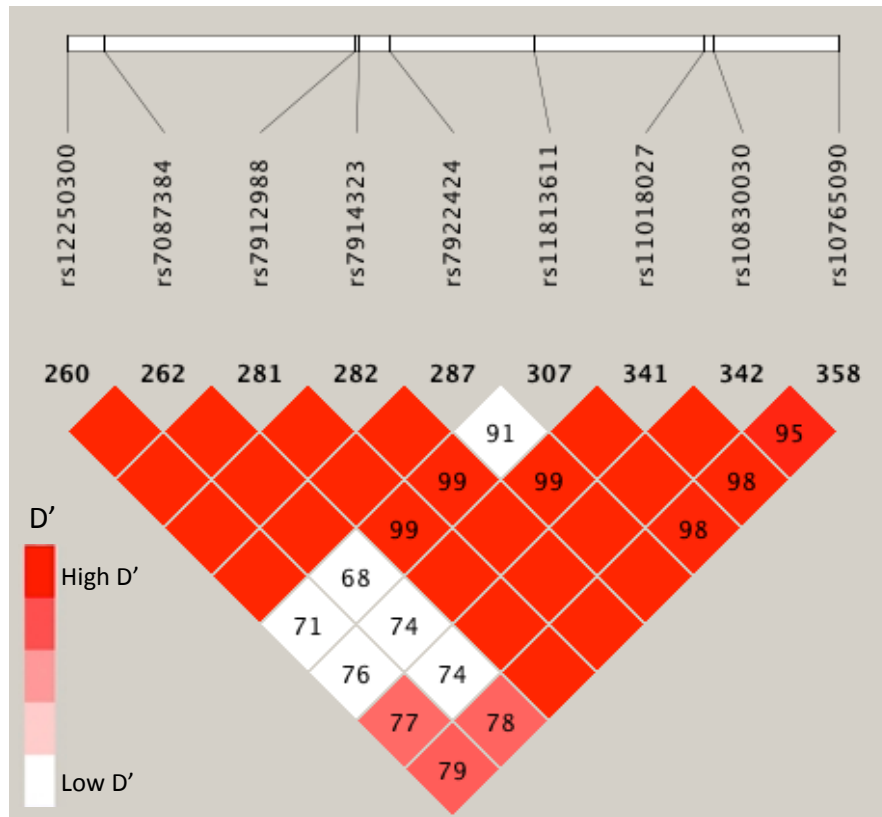

(B)

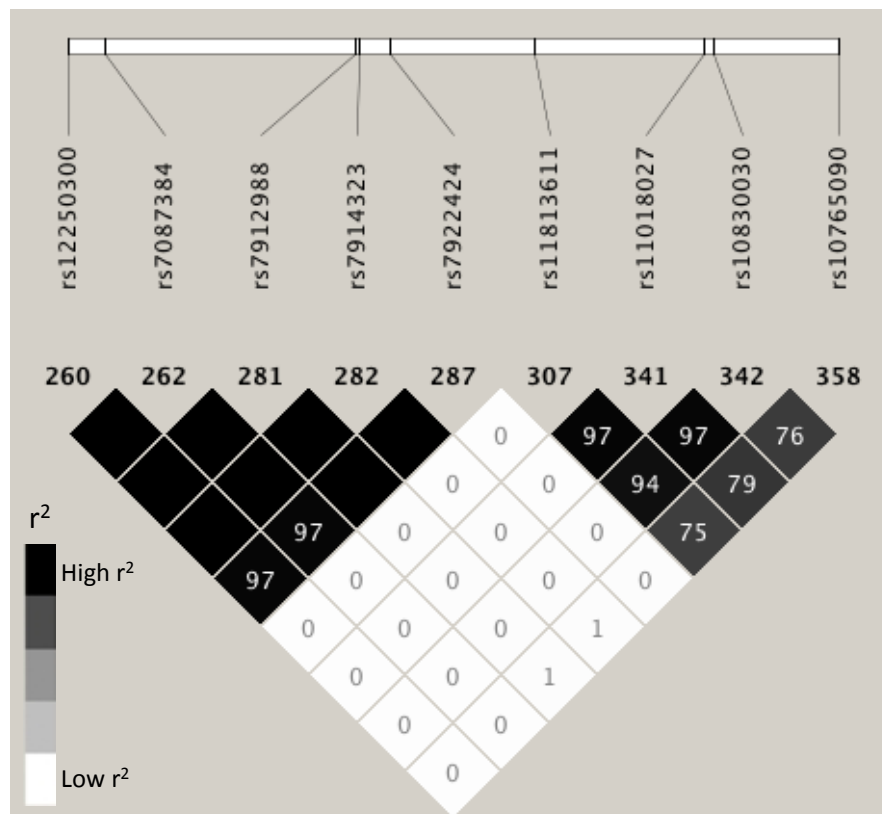

Supplement: 1471-2350-15-18-S2.pdf [file 1471-2350-15-18-S2.pdf]
